# Supplementary material for: Metabolite profiling in 18 Saudi date palm fruit cultivars and their antioxidant potential via UPLC-qTOF-MS and multivariate data analyses
Source: Royal Society of Chemistry journal article supplement (doi:10.1039/c5fo01570g), 2016-01-01
Supplement: c5fo01570g1.pdf [file c5fo01570g1.pdf]

Supplementary Information

| Peak | Rt (min) | Metabolite                     | m/z; mass used for quantification |
|------|----------|--------------------------------|-----------------------------------|
| 1    | 15.562   | Glycerol TMS                   | 205                               |
| 2    | 15.731   | Phosphoric acid TMS            | 299                               |
| 3    | 21.279   | Malic acid TMS                 | 147                               |
| 4    | 22.358   | Xylose TMS                     | 307                               |
| 5    | 24.216   | Piperidine carboxylic acid TMS | 244                               |
| 6    | 25.003   | Oxalic acid TMS                | 204                               |
| 7    | 26.189   | Xylitol TMS                    | 217                               |
| 8    | 27.336   | Ribohexitol TMS                | 231                               |
| 9    | 27.953   | Xylofuranose TMS               | 217                               |
| 10   | 28.143   | Unknown                        | 231                               |
| 11   | 28.631   | Fructose TMS                   | 217                               |
| 12   | 28.76    | Citric acid TMS                | 273                               |
| 13   | 28.895   | Pinitol TMS                    | 318                               |
| 14   | 29.411   | Tagatose TMS                   | 307                               |
| 15   | 29.75    | Fructose methoxyamine TMS      | 307                               |
| 16   | 29.96    | Fructose methoxyamine TMS      | 307                               |
| 17   | 30.063   | Mannose methoxyamine TMS       | 319                               |
| 18   | 30.164   | Galactose methoxyamine TMS     | 319                               |
| 19   | 30.327   | Glucose methoxyamine TMS       | 205                               |
| 20   | 30.72    | Glucose methoxyamine TMS       | 205                               |
| 21   | 31.052   | Erythritol methoxyamine TMS    | 205                               |
| 22   | 31.88    | Talose methoxyamine TMS        | 204                               |
| 23   | 32.32    | Gluconic acid TMS              | 333                               |
| 24   | 32.88    | Galactose methoxyamine TMS     | 204                               |
| 25   | 34.09    | Myo-inositol methoxyamine TMS  | 305                               |
| 26   | 35.8     | Unknown                        | 204                               |
| 27   | 43.04    | Sucrose TMS                    | 36                                |

**Suppl. Table 1.** Metabolites identified in *P. dactylifera* whole fruit water extract analysed via GC-MS as (TMS)-trimethylsilylated derivatives

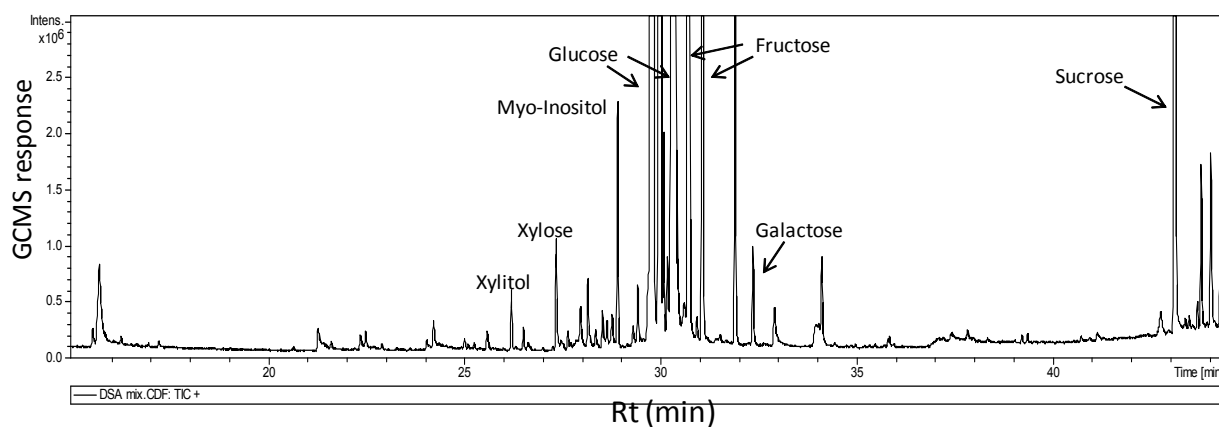

**Suppl. Fig.1** GC/MS chromatogram of *P. dactylifera* silylated primary metabolites identified using GC-MS post silylation.

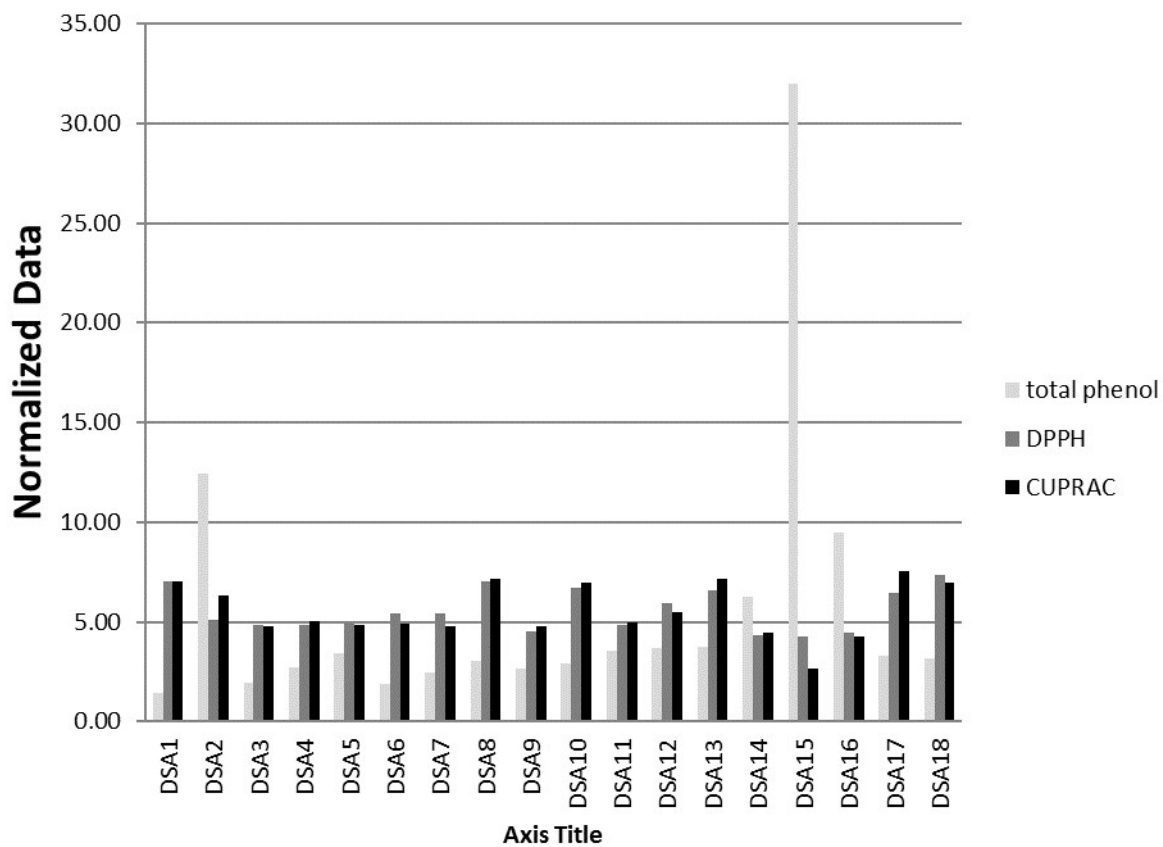

**Supp. Fig. 2** Normalized data of the antioxidant capacities (DPPH & CUPRAC assay) and total phenolics of 18 *Phoenix dactylifera* Saudi grown cultivars
